# Supplementary material for: The Effects of Stress on Glycemic Control Brought on by Changes in Social Conditions Due to COVID-19
Source: PubMed Central journal article supplement — Intern Med. 2021 Oct 12;60(24):3879–88. doi: 10.2169/internalmedicine.8134-21 (PMC8758450; doi:10.2169/internalmedicine.8134-21), 2021-10-12
Supplement: 1349-7235-60-3879-s002.pdf [file 1349-7235-60-3879-s002.pdf]

Supp.2 Changes in work style and changes in HbA1c

|                                         |                        |                       | HbA1c          |        |      |       |      |       |       | Tukey-Kramer test (about delta) |            |            |            |            |            |       |
|-----------------------------------------|------------------------|-----------------------|----------------|--------|------|-------|------|-------|-------|---------------------------------|------------|------------|------------|------------|------------|-------|
|                                         | Before the declaration | After the declaration | n              | before |      | after |      | delta |       | p (A vs B)                      | p (A vs C) | p (A vs D) | p (B vs C) | p (B vs D) | p (C vs D) |       |
|                                         |                        |                       |                | mean   | sd   | mean  | sd   | mean  | sd    |                                 |            |            |            |            |            |       |
| Telecommuting<br>(working from home)    | A                      | Applicable            | Applicable     | 123    | 7.23 | 0.96  | 7.02 | 0.85  | -0.21 | 0.60                            | 0.989      | 0.994      | 0.934      | 0.995      | 0.958      | 0.651 |
|                                         | B                      | Applicable            | Not applicable | 9      | 7.29 | 0.90  | 7.16 | 0.75  | -0.13 | 0.28                            |            |            |            |            |            |       |
|                                         | C                      | Not applicable        | Applicable     | 310    | 7.24 | 0.98  | 7.05 | 0.93  | -0.19 | 0.64                            |            |            |            |            |            |       |
|                                         | D                      | Not applicable        | Not applicable | 360    | 7.35 | 1.00  | 7.10 | 0.86  | -0.25 | 0.75                            |            |            |            |            |            |       |
| Commuting (working<br>outside the home) | A                      | Applicable            | Applicable     | 595    | 7.31 | 1.03  | 7.09 | 0.92  | -0.22 | 0.73                            | 0.991      | 0.862      | 0.960      | 0.914      | 0.997      | 0.948 |
|                                         | B                      | Applicable            | Not applicable | 116    | 7.20 | 0.87  | 7.00 | 0.82  | -0.20 | 0.55                            |            |            |            |            |            |       |
|                                         | C                      | Not applicable        | Applicable     | 12     | 7.09 | 0.84  | 7.03 | 0.94  | -0.07 | 0.48                            |            |            |            |            |            |       |
|                                         | D                      | Not applicable        | Not applicable | 79     | 7.21 | 0.81  | 7.03 | 0.69  | -0.18 | 0.56                            |            |            |            |            |            |       |
