# Supplementary material for: The Effects of Stress on Glycemic Control Brought on by Changes in Social Conditions Due to COVID-19
Source: PubMed Central journal article supplement — Intern Med. 2021 Oct 12;60(24):3879–88. doi: 10.2169/internalmedicine.8134-21 (PMC8758450; doi:10.2169/internalmedicine.8134-21), 2021-10-12
Supplement: 1349-7235-60-3879-s003.pdf [file 1349-7235-60-3879-s003.pdf]

**Stressed Group**

|            |                                                    |           |
|------------|----------------------------------------------------|-----------|
| Occupation | Administrative position                            | 4 (9.8%)  |
|            | Specialist job and technical job                   | 6 (14.6%) |
|            | Clerical workers                                   | 7 (17.1%) |
|            | Sales workers                                      | 4 (9.8%)  |
|            | Service workers                                    | 2 (4.9%)  |
|            | Security workers                                   | 0 (0%)    |
|            | Agricultural, forestry, and fishery workers        | 0 (0%)    |
|            | Manufacturing process workers                      | 0 (0%)    |
|            | Transportation and machine operation workers       | 1 (2.4%)  |
|            | Construction and mining workers                    | 2 (4.9%)  |
|            | Carrying, cleaning, packaging, and related workers | 0 (0%)    |
|            | Unemployment after forced retirement               | 1 (2.4%)  |
|            | Unemployment                                       | 4 (9.8%)  |
|            | Houseworkers                                       | 7 (17.1%) |
|            | Others                                             | 3 (7.3%)  |

**Employment status**

|                                                        |            |                |
|--------------------------------------------------------|------------|----------------|
| Currently working                                      | Applicable | Not applicable |
|                                                        | 29         | 12             |
| Increased frequency of work from home                  | Applicable | Not applicable |
|                                                        | 15 (36.6%) | 26 (63.4%)     |
| Commuting by car instead of other transportation means | Applicable | Not applicable |
|                                                        | 2 (4.9%)   | 39 (95.1%)     |
| Telecommuting (working from home)                      | Applicable | Not applicable |
| Before the declaration                                 | 5 (14.7%)  | 29 (85.3%)     |
| After the declaration                                  | 22 (62.9%) | 13 (37.1%)     |

**Unstressed group**

|            |                                                    |             |
|------------|----------------------------------------------------|-------------|
| Occupation | Administrative position                            | 175 (18.4%) |
|            | Specialist job and technical job                   | 159 (16.7%) |
|            | Clerical workers                                   | 129 (13.5%) |
|            | Sales workers                                      | 69 (7.2%)   |
|            | Service workers                                    | 60 (6.3%)   |
|            | Security workers                                   | 9 (0.9%)    |
|            | Agricultural, forestry, and fishery workers        | 0 (0%)      |
|            | Manufacturing process workers                      | 14 (1.5%)   |
|            | Transportation and machine operation workers       | 24 (2.5%)   |
|            | Construction and mining workers                    | 25 (2.6%)   |
|            | Carrying, cleaning, packaging, and related workers | 24 (2.5%)   |
|            | Unemployment after forced retirement               | 93 (9.8%)   |
|            | Unemployment                                       | 55 (5.8%)   |
|            | Houseworkers                                       | 70 (7.3%)   |
|            | Others                                             | 47 (4.9%)   |

|                                                        |             |                |
|--------------------------------------------------------|-------------|----------------|
| Currently working                                      | Applicable  | Not applicable |
|                                                        | 735         | 218            |
| Increased frequency of work from home                  | Applicable  | Not applicable |
|                                                        | 313 (32.6%) | 646 (67.4%)    |
| Commuting by car instead of other transportation means | Applicable  | Not applicable |
|                                                        | 51 (5.3%)   | 908 (94.7%)    |
| Telecommuting (working from home)                      | Applicable  | Not applicable |
| Before the declaration                                 | 127 (16.2%) | 657 (83.8%)    |
| After the declaration                                  | 419 (51.7%) | 392 (48.3%)    |

p (between two groups)  
(Fisher's exact test)

-

0.346

0.612

1.000

1.000

0.228

**Stressed Group**

**Unstressed group**

p (between two groups)

**Dietary life**

| Food intake                      | Increased                                              | Decreased  | Unchanged  | Food intake                      | Increased                                              | Decreased   | Unchanged   |       |
|----------------------------------|--------------------------------------------------------|------------|------------|----------------------------------|--------------------------------------------------------|-------------|-------------|-------|
|                                  | 6 (15.4%)                                              | 8 (20.5%)  | 25 (64.1%) |                                  | 108 (11.4%)                                            | 212 (22.4%) | 628 (66.2%) | 0.700 |
| Reason for increased food intake | Stress                                                 | 4 (28.6%)  |            | Reason for increased food intake | Stress                                                 | 48 (25.8%)  |             | -     |
|                                  | Boredom                                                | 4 (28.6%)  |            |                                  | Boredom                                                | 67 (36%)    |             |       |
|                                  | Others                                                 | 4 (28.6%)  |            |                                  | Others                                                 | 60 (32.3%)  |             |       |
|                                  | Stress/Boredom                                         | 2 (14.3%)  |            |                                  | Stress/Boredom                                         | 7 (3.8%)    |             |       |
|                                  | Stress/Others                                          | 0 (0%)     |            |                                  | Stress/Others                                          | 1 (0.5%)    |             |       |
|                                  | Boredom/Others                                         | 0 (0%)     |            |                                  | Boredom/Others                                         | 3 (1.6%)    |             |       |
| Reason for decreased food intake | Stress                                                 | 0 (0%)     |            | Reason for decreased food intake | Stress                                                 | 18 (6.9%)   |             | -     |
|                                  | Gradually ate less naturally                           | 8 (88.9%)  |            |                                  | Gradually ate less naturally                           | 131 (50%)   |             |       |
|                                  | Watched by family members                              | 0 (0%)     |            |                                  | Watched by family members                              | 5 (1.9%)    |             |       |
|                                  | Others                                                 | 1 (11.1%)  |            |                                  | Others                                                 | 94 (35.9%)  |             |       |
|                                  | Stress/Gradually ate less naturally                    | 0 (0%)     |            |                                  | Stress/Gradually ate less naturally                    | 7 (2.7%)    |             |       |
|                                  | Stress/Watched by family members                       | 0 (0%)     |            |                                  | Stress/Watched by family members                       | 1 (0.4%)    |             |       |
|                                  | Gradually ate less naturally/Watched by family members | 0 (0%)     |            |                                  | Gradually ate less naturally/Watched by family members | 2 (0.8%)    |             |       |
|                                  | Gradually ate less naturally/Others                    | 0 (0%)     |            |                                  | Gradually ate less naturally/Others                    | 4 (1.5%)    |             |       |
| Main meal                        | Self-catering                                          | Eating out |            | Main meal                        | Self-catering                                          | Eating out  |             |       |
| Before the declaration           | 33 (86.8%)                                             | 5 (13.2%)  |            | Before the declaration           | 715 (76.7%)                                            | 217 (23.3%) |             | 0.171 |
| After the declaration            | 35 (94.6%)                                             | 2 (5.4%)   |            | After the declaration            | 829 (88.8%)                                            | 105 (11.2%) |             | 0.419 |

**Status of drunkenness**

| Alcohol consumption                      | Increased             | Decreased  | Unchanged  | Alcohol consumption                      | Increased             | Decreased   | Unchanged   |       |
|------------------------------------------|-----------------------|------------|------------|------------------------------------------|-----------------------|-------------|-------------|-------|
|                                          | 3 (7.7%)              | 13 (33.3%) | 23 (59%)   |                                          | 65 (7.3%)             | 302 (33.9%) | 523 (58.8%) | 1.000 |
| Frequency of drinking                    | Increased             | Decreased  | Unchanged  | Frequency of drinking                    | Increased             | Decreased   | Unchanged   |       |
|                                          | 2 (5.4%)              | 21 (56.8%) | 14 (37.8%) |                                          | 35 (3.9%)             | 504 (56.7%) | 350 (39.4%) | 0.825 |
| Reason for increased alcohol consumption | Stress                | 4 (80%)    |            | Reason for increased alcohol consumption | Stress                | 20 (15.9%)  |             | -     |
|                                          | Boredom               | 1 (20%)    |            |                                          | Boredom               | 48 (38.1%)  |             |       |
|                                          | Others                | 0 (0%)     |            |                                          | Others                | 51 (40.5%)  |             |       |
|                                          | Stress/Boredom        | 0 (0%)     |            |                                          | Stress/Boredom        | 6 (4.8%)    |             |       |
|                                          | Stress/Boredom/Others | 0 (0%)     |            |                                          | Stress/Boredom/Others | 1 (0.8%)    |             |       |

**Stressed Group**

|                                          |                                                                     |           |
|------------------------------------------|---------------------------------------------------------------------|-----------|
| Reason for decreased alcohol consumption | Stress                                                              | 0 (0%)    |
|                                          | Naturally felt less like drinking alcohol                           | 7 (46.7%) |
|                                          | Watched by family members                                           | 0 (0%)    |
|                                          | Others                                                              | 8 (53.3%) |
|                                          | Stress/Gradually ate less naturally                                 | 0 (0%)    |
|                                          | Stress/Others                                                       | 0 (0%)    |
|                                          | Naturally felt less like drinking alcohol/Watched by family members | 0 (0%)    |
|                                          | Naturally felt less like drinking alcohol/Others                    | 0 (0%)    |

**Unstressed group**

|                                          |                                                                     |             |
|------------------------------------------|---------------------------------------------------------------------|-------------|
| Reason for decreased alcohol consumption | Stress                                                              | 3 (0.8%)    |
|                                          | Naturally felt less like drinking alcohol                           | 139 (39.4%) |
|                                          | Watched by family members                                           | 7 (2%)      |
|                                          | Others                                                              | 194 (55%)   |
|                                          | Stress/Gradually ate less naturally                                 | 1 (0.3%)    |
|                                          | Stress/Others                                                       | 1 (0.3%)    |
|                                          | Naturally felt less like drinking alcohol/Watched by family members | 2 (0.6%)    |
|                                          | Naturally felt less like drinking alcohol/Others                    | 6 (1.7%)    |

p (between two groups)

|                                          |           |            |           |                                          |             |             |             |       |
|------------------------------------------|-----------|------------|-----------|------------------------------------------|-------------|-------------|-------------|-------|
| Amount of exercise and physical activity | Increased | Decreased  | Unchanged | Amount of exercise and physical activity | Increased   | Decreased   | Unchanged   |       |
|                                          | 4 (10%)   | 29 (72.5%) | 7 (17.5%) |                                          | 131 (13.8%) | 515 (54.3%) | 303 (31.9%) | 0.078 |

|                                                                                                                       |            |                |  |                                                                                                                       |             |                |  |       |
|-----------------------------------------------------------------------------------------------------------------------|------------|----------------|--|-----------------------------------------------------------------------------------------------------------------------|-------------|----------------|--|-------|
| Refraining from exercise to avoid three Cs (crowded places, close-contact settings, and confined and enclosed spaces) | Applicable | Not applicable |  | Refraining from exercise to avoid three Cs (crowded places, close-contact settings, and confined and enclosed spaces) | Applicable  | Not applicable |  |       |
|                                                                                                                       | 9 (22%)    | 32 (78%)       |  |                                                                                                                       | 169 (17.6%) | 790 (82.4%)    |  | 0.530 |

|                         |                  |                           |  |                         |                  |                           |  |       |
|-------------------------|------------------|---------------------------|--|-------------------------|------------------|---------------------------|--|-------|
| Body weight measurement | Took measurement | did not take measurements |  | Body weight measurement | Took measurement | did not take measurements |  |       |
|                         | 31 (81.6%)       | 7 (18.4%)                 |  |                         | 683 (75%)        | 228 (25%)                 |  | 0.445 |

**Mental status**

|       |           |           |            |       |           |             |             |       |
|-------|-----------|-----------|------------|-------|-----------|-------------|-------------|-------|
| smile | Increased | Decreased | Unchanged  | smile | Increased | Decreased   | Unchanged   |       |
|       | 2 (4.9%)  | 9 (22%)   | 30 (73.2%) |       | 21 (2.3%) | 167 (18.2%) | 730 (79.5%) | 0.306 |

|             |            |           |            |             |             |           |             |       |
|-------------|------------|-----------|------------|-------------|-------------|-----------|-------------|-------|
| Frustration | Increased  | Decreased | Unchanged  | Frustration | Increased   | Decreased | Unchanged   |       |
|             | 20 (48.8%) | 2 (4.9%)  | 19 (46.3%) |             | 254 (27.7%) | 55 (6%)   | 607 (66.3%) | 0.016 |

**Frustration was not used as covariance. Instead of it, we use stress level.**

|            |           |            |           |            |           |             |             |       |
|------------|-----------|------------|-----------|------------|-----------|-------------|-------------|-------|
| Motivation | Increased | Decreased  | Unchanged | Motivation | Increased | Decreased   | Unchanged   |       |
|            | 2 (4.9%)  | 14 (34.1%) | 25 (61%)  |            | 30 (3.3%) | 287 (31.3%) | 601 (65.5%) | 0.650 |

|                          |           |             |            |                          |             |             |             |       |
|--------------------------|-----------|-------------|------------|--------------------------|-------------|-------------|-------------|-------|
| For lifestyle management | Favorable | Unfavorable | No opinion | For lifestyle management | Favorable   | Unfavorable | No opinion  |       |
|                          | 5 (12.5%) | 15 (37.5%)  | 20 (50%)   |                          | 162 (17.6%) | 202 (22%)   | 555 (60.4%) | 0.087 |

|                             |            |           |                              |                             |             |           |                              |       |
|-----------------------------|------------|-----------|------------------------------|-----------------------------|-------------|-----------|------------------------------|-------|
| Status of outpatient visits | Continued  | Suspended | Drug therapy alone continued | Status of outpatient visits | Continued   | Suspended | Drug therapy alone continued |       |
|                             | 34 (87.2%) | 1 (2.6%)  | 4 (10.3%)                    |                             | 818 (89.1%) | 26 (2.8%) | 74 (8.1%)                    | 0.756 |

**Medication adherence**

| <b><u>Stressed Group</u></b> |                         |                                              | <b><u>Unstressed group</u></b> |                         |                                              | p (between two groups) |
|------------------------------|-------------------------|----------------------------------------------|--------------------------------|-------------------------|----------------------------------------------|------------------------|
| Drugs                        | Continued as prescribed | Adjusted based on the patient's own judgment | Drugs                          | Continued as prescribed | Adjusted based on the patient's own judgment |                        |
|                              | 39(100%)                | 0 (0%)                                       |                                | 882 (97.1%)             | 26 (2.9%)                                    | 0.621                  |

| <b>Stressed Group</b>                                                                                                                                |                                   |                                               |                  | <b>Unstressed group</b>                |                                   |                                               |                  | p (between two groups) |
|------------------------------------------------------------------------------------------------------------------------------------------------------|-----------------------------------|-----------------------------------------------|------------------|----------------------------------------|-----------------------------------|-----------------------------------------------|------------------|------------------------|
|                                                                                                                                                      | Adhered to the instructions       | Adjusted based on the patient's own judgment  | Used irregularly |                                        | Adhered to the instructions       | Adjusted based on the patient's own judgment  | Used irregularly |                        |
| Regarding oral drugs or injections                                                                                                                   |                                   |                                               |                  | Regarding oral drugs or injections     |                                   |                                               |                  |                        |
| Before the declaration                                                                                                                               | 35 (89.7%)                        | 3 (7.7%)                                      | 1 (2.6%)         | Before the declaration                 | 875 (95.8%)                       | 27 (3%)                                       | 11 (1.2%)        | 0.139                  |
| After the declaration                                                                                                                                | 36 (94.7%)                        | 2 (5.3%)                                      | 0 (0%)           | After the declaration                  | 876 (95.7%)                       | 33 (3.6%)                                     | 6 (0.7%)         | 0.724                  |
| Frequency of blood glucose measurement                                                                                                               |                                   |                                               |                  | Frequency of blood glucose measurement |                                   |                                               |                  |                        |
| Before the declaration                                                                                                                               | 16 (94.1%)                        | 0 (0%)                                        | 1 (5.9%)         | Before the declaration                 | 438 (84.4%)                       | 31 (6%)                                       | 50 (9.6%)        | 0.873                  |
| After the declaration                                                                                                                                | 18 (94.7%)                        | 0 (0%)                                        | 1 (5.3%)         | After the declaration                  | 447 (85.3%)                       | 31 (5.9%)                                     | 46 (8.8%)        | 0.768                  |
| Shortage of drugs                                                                                                                                    | Yes                               | No                                            |                  | Shortage of drugs                      | Yes                               | No                                            |                  |                        |
| Before the declaration                                                                                                                               | 1 (2.6%)                          | 38 (97.4%)                                    |                  | Before the declaration                 | 20 (2.2%)                         | 898 (97.8%)                                   |                  | 0.587                  |
| After the declaration                                                                                                                                | 0 (0%)                            | 39 (100%)                                     |                  | After the declaration                  | 33 (3.6%)                         | 887 (96.4%)                                   |                  | 0.640                  |
| Self-monitoring of blood glucose                                                                                                                     | Performing                        | Not performing                                |                  | Self-monitoring of blood glucose       | Performing                        | Not performing                                |                  |                        |
|                                                                                                                                                      | 9 (22%)                           | 32 (78%)                                      |                  |                                        | 215 (23.5%)                       | 699 (76.5%)                                   |                  | 1.000                  |
| <b>Presence or absence of perceived effects of self-quarantining associated with the declaration on the management of lifestyle-related diseases</b> |                                   |                                               |                  |                                        |                                   |                                               |                  |                        |
| Sedentary behavior                                                                                                                                   | Continued for at least 30 minutes | Suspended every 30 minutes and moved the body |                  | Sedentary behavior                     | Continued for at least 30 minutes | Suspended every 30 minutes and moved the body |                  |                        |
| Before the declaration                                                                                                                               | 32 (94.1%)                        | 2 (5.9%)                                      |                  | Before the declaration                 | 669 (82%)                         | 147 (18%)                                     |                  | 0.103                  |
| After the declaration                                                                                                                                | 33 (94.3%)                        | 2 (5.7%)                                      |                  | After the declaration                  | 645 (83.8%)                       | 125 (16.2%)                                   |                  | 0.150                  |

| <b><u>Stressed group</u></b> |               |              |              |               | <b><u>Unstressed group</u></b> |               |              |              |               | p (between two groups) |  |
|------------------------------|---------------|--------------|--------------|---------------|--------------------------------|---------------|--------------|--------------|---------------|------------------------|--|
|                              |               |              |              |               |                                |               |              |              |               | (U-test)               |  |
| Status of exercise           | Achieved 100% | Achieved 80% | Achieved 50% | Less than 50% | Status of exercise             | Achieved 100% | Achieved 80% | Achieved 50% | Less than 50% |                        |  |
| Before the declaration       | 8 (20%)       | 11 (27.5%)   | 12 (30%)     | 9 (22.5%)     | Before the declaration         | 184 (19.6%)   | 258 (27.5%)  | 233 (24.8%)  | 263 (28%)     | 0.714                  |  |
| After the declaration        | 5 (12.2%)     | 6 (14.6%)    | 12 (29.3%)   | 18 (43.9%)    | After the declaration          | 131 (14.4%)   | 164 (18%)    | 222 (24.4%)  | 394 (43.2%)   | 0.688                  |  |

Supp3. Patient Characteristics (other items)

| items                                              | <u>Stressed group</u> |       |      |                   | <u>Unstressed group</u> |       |      |                   | p (between two groups)<br>(Student's t-test) |
|----------------------------------------------------|-----------------------|-------|------|-------------------|-------------------------|-------|------|-------------------|----------------------------------------------|
|                                                    | n                     | mean  | sd   | p (paired t-test) | n                       | mean  | sd   | p (paired t-test) |                                              |
| Number of days working from home per week (before) | 32                    | 0.67  | 1.42 |                   | 724                     | 0.50  | 1.35 |                   | 0.472                                        |
| Number of days working from home per week (after)  | 32                    | 2.30  | 2.06 | <0.001            | 724                     | 1.77  | 1.99 | <0.001            | 0.143                                        |
| ΔNumber of days working from home per week         | 32                    | 1.63  | 1.82 |                   | 724                     | 1.27  | 1.87 |                   | 0.298                                        |
| Frequency of eating out per week (before)          | 37                    | 1.71  | 1.71 |                   | 892                     | 2.06  | 1.97 |                   | 0.292                                        |
| Frequency of eating out per week (after)           | 37                    | 0.49  | 1.02 | <0.001            | 892                     | 1.17  | 1.75 | <0.001            | <b>0.019</b>                                 |
| ΔFrequency of eating out per week                  | 37                    | -1.22 | 1.73 |                   | 892                     | -0.89 | 1.33 |                   | 0.141                                        |
| Frequency of drinking sessions per week (before)   | 37                    | 0.57  | 1.12 |                   | 869                     | 0.74  | 1.24 |                   | 0.403                                        |
| Frequency of drinking sessions per week (after)    | 37                    | 0.03  | 0.16 | 0.004             | 869                     | 0.27  | 0.92 | <0.001            | 0.113                                        |
| ΔFrequency of drinking sessions per week           | 37                    | -0.54 | 1.07 |                   | 869                     | -0.47 | 0.90 |                   | 0.654                                        |
| Time spent watching TV per day (hrs) (before)      | 38                    | 2.34  | 1.50 |                   | 908                     | 2.94  | 2.17 |                   | 0.093                                        |
| Time spent watching TV per day (hrs) (after)       | 38                    | 2.95  | 1.55 | <0.001            | 908                     | 3.54  | 2.42 | <0.001            | 0.134                                        |
| ΔTime spent watching TV per day (hrs)              | 38                    | 0.61  | 0.80 |                   | 908                     | 0.60  | 1.41 |                   | 0.991                                        |
| Sleep time per day (hrs) (before)                  | 37                    | 6.03  | 1.10 |                   | 899                     | 6.19  | 1.02 |                   | 0.354                                        |
| Sleep time per day (hrs) (after)                   | 37                    | 6.13  | 1.21 | 0.254             | 899                     | 6.33  | 1.10 | <0.001            | 0.277                                        |
| ΔSleep time per day (hrs)                          | 37                    | 0.10  | 0.53 |                   | 899                     | 0.14  | 0.70 |                   | 0.709                                        |
