# Supplementary material for: The Effects of Stress on Glycemic Control Brought on by Changes in Social Conditions Due to COVID-19
Source: PubMed Central journal article supplement — Intern Med. 2021 Oct 12;60(24):3879–88. doi: 10.2169/internalmedicine.8134-21 (PMC8758450; doi:10.2169/internalmedicine.8134-21), 2021-10-12
Supplement: 1349-7235-60-3879-s004.pdf [file 1349-7235-60-3879-s004.pdf]

**Supp. 4 Correlation between changes in HbA1c levels and the Stress**

| Item            | n   | $\rho$ | p     | * |
|-----------------|-----|--------|-------|---|
| Stress (before) | 939 | -0.03  | 0.391 |   |
| Stress (after)  | 945 | 0.03   | 0.371 |   |
| $\Delta$ Stress | 936 | 0.07   | 0.034 | * |

\*p<0.05 Spearman's test
