# Supplementary material for: The Effects of Stress on Glycemic Control Brought on by Changes in Social Conditions Due to COVID-19
Source: PubMed Central journal article supplement — Intern Med. 2021 Oct 12;60(24):3879–88. doi: 10.2169/internalmedicine.8134-21 (PMC8758450; doi:10.2169/internalmedicine.8134-21), 2021-10-12
Supplement: 1349-7235-60-3879-s005.pdf [file 1349-7235-60-3879-s005.pdf]

Supp.5 Changes in stress and anxiety within each group.

| Stress                  |        | Mean ± sd | median (1st quartile, 3rd quartile) | p (before vs after, Wilcoxon signed rank test) |
|-------------------------|--------|-----------|-------------------------------------|------------------------------------------------|
| Stressed group (n=41)   | before | 3 ± 1.2   | 3 (2, 4)                            | 0.126                                          |
|                         | after  | 3.3 ± 1.3 | 3 (3, 4)                            |                                                |
|                         | delta  | 0.3 ± 1.3 | 0 (0, 1)                            |                                                |
| Unstressed group(n=898) | before | 2.3 ± 1.2 | 3 (1, 3)                            | <0.001                                         |
|                         | after  | 2.7 ± 1.4 | 3 (2, 4)                            |                                                |
|                         | delta  | 0.4 ± 1   | 0 (0, 1)                            |                                                |

Responses to the questionnaire (Stress). The stress level was answered in 5 grades from 0 to 5.

(As reference) Comparison results between the two groups for delta: p=0.991 Mann–Whitney U test.

| Anxiety                  |        | Mean ± sd | median (1st quartile, 3rd quartile) | p (before vs after, Wilcoxon signed rank test) |
|--------------------------|--------|-----------|-------------------------------------|------------------------------------------------|
| Stressed group (n=41)    | before | 2.7 ± 1.3 | 3 (2, 3)                            | <0.001                                         |
|                          | after  | 3.2 ± 1.3 | 3 (3, 4)                            |                                                |
|                          | delta  | 0.5 ± 0.9 | 0 (0, 1)                            |                                                |
| Unstressed group (n=899) | before | 2.1 ± 1.2 | 2 (1, 3)                            | <0.001                                         |
|                          | after  | 2.7 ± 1.4 | 3 (2, 4)                            |                                                |
|                          | delta  | 0.6 ± 1   | 0 (0, 1)                            |                                                |

Responses to the questionnaire (anxiety). The anxiety level was answered in 5 grades from 0 to 5.

(As reference) Comparison results between the two groups for delta: p=0.809 Mann–Whitney U test.
